# Supplementary material
Source: PubMed Central journal article supplement (PMC7093258)
Supplement: NIHMS1553378-supplement-1.pdf [file NIHMS1553378-supplement-1.pdf]

## SUPPLEMENTAL FIGURES

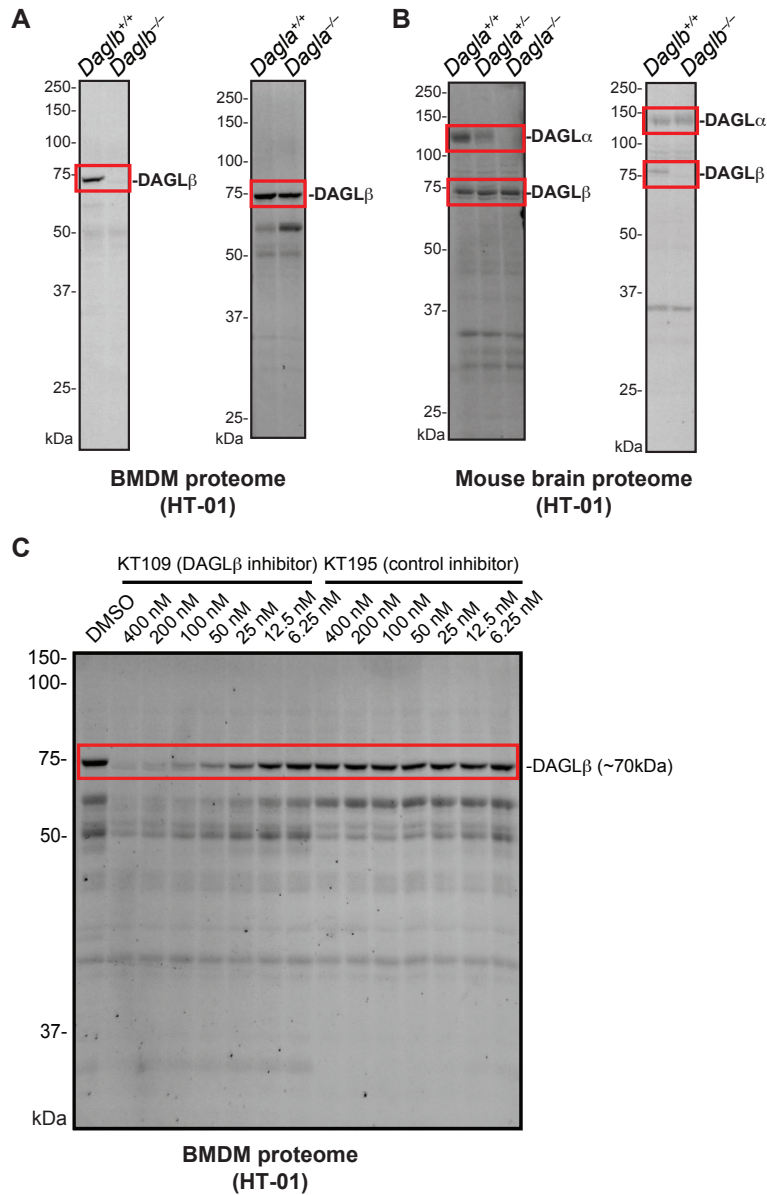

**Figure S1. Related to Figures 1 and 3. HT-01-based activity-based protein profiling (ABPP) of DAGL activity in primary macrophage and brain proteomes.** (A) Native DAGLβ but not DAGLα activity was detected in BMDMs as judged by gel-based ABPP analyses with HT-01. BMDM membrane proteomes were treated with the DAGL-tailored ABPP probe HT-01 (1 μM, 30 min, 37 °C) followed by SDS-PAGE and in-gel fluorescence scanning to measure active DAGLs in BMDM proteomes. (B) Native DAGLα and DAGLβ were active and detected in mouse brain proteomes. Gel-based ABPP analysis of brain membrane proteomes from DAGL wild-type (*Dagl<sup>+/+</sup>*), heterozygous (*Dagl<sup>+/-</sup>*), and knockout (*Dagl<sup>-/-</sup>*) mice treated with HT-01 probe. (C) BMDMs were treated with varying concentrations of the DAGLβ inhibitor (KT109) or matching negative control compound (KT195) for 4 hrs at 37 °C followed by cell lysis and HT-01-based ABPP profiling of membrane proteomes (1 μM probe, 30 min, 37 °C). KT109 but not KT195 showed concentration-dependent blockade of HT-01 labeling of endogenous DAGLβ in proteomes from compound-treated cells.

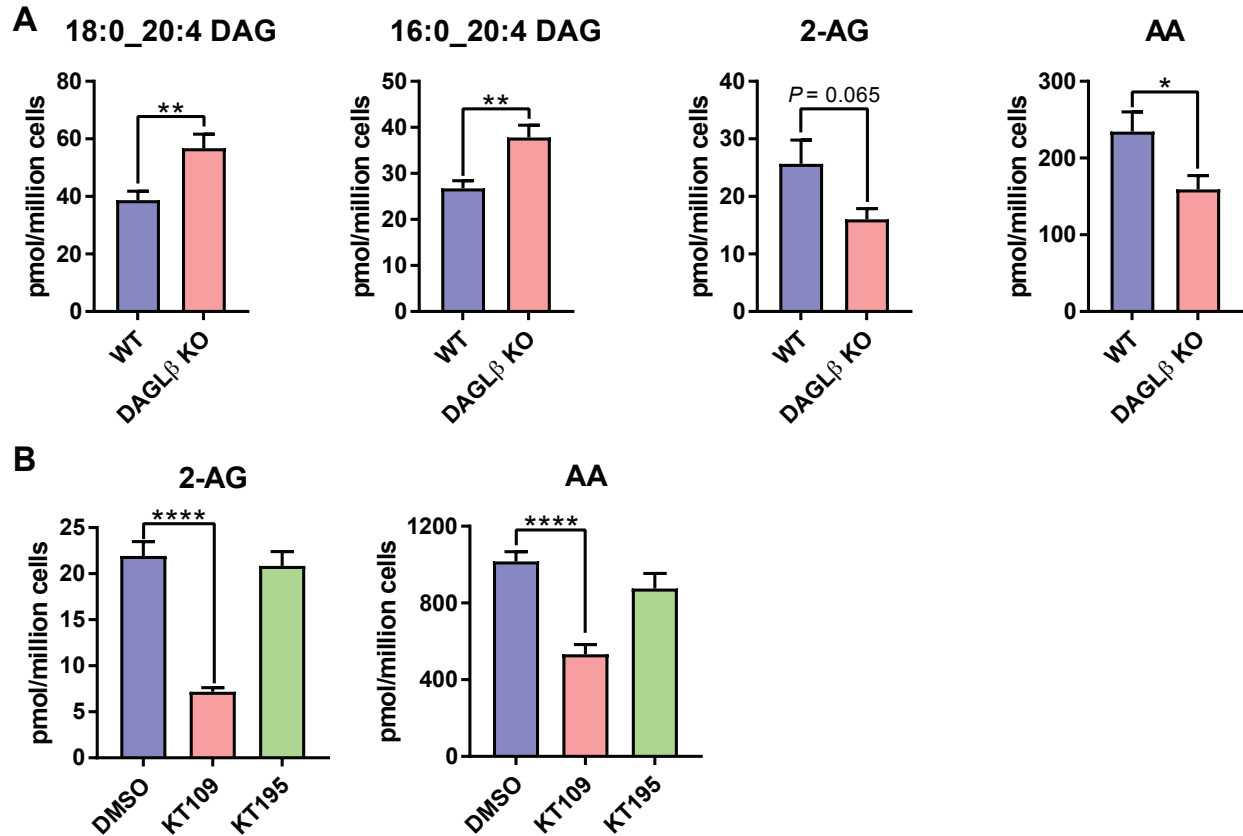

**Figure S2. Related to Figures 1 and 3. Metabolomics analysis of DAGL $\beta$ -disrupted BMDMs.** (A) Targeted metabolomics demonstrated that genetic knockout of DAGL $\beta$  resulted in cellular accumulation of lipid substrates (DAG) and depletion of products (2-AG, arachidonic acid or AA) in BMDMs. Statistical significance was determined using a two-tailed t-test ( $*P < 0.05$ ,  $**P < 0.01$ ;  $n=5-10$  biological samples). (B) Targeted metabolomics showed that pharmacological blockade of DAGL $\beta$  reduced cellular 2-AG and AA in wild-type BMDMs as expected based on the role of DAGL $\beta$  in endocannabinoid biosynthesis ( $n=6-11$  biological samples). Statistical significance was determined using a one-way ANOVA test with Dunnett multiple comparison correction ( $****P < 0.0001$ ). All data shown represent mean  $\pm$  s.e.m. and are representative of one or two independent experiments ( $n=1-2$  biologically independent experiments).

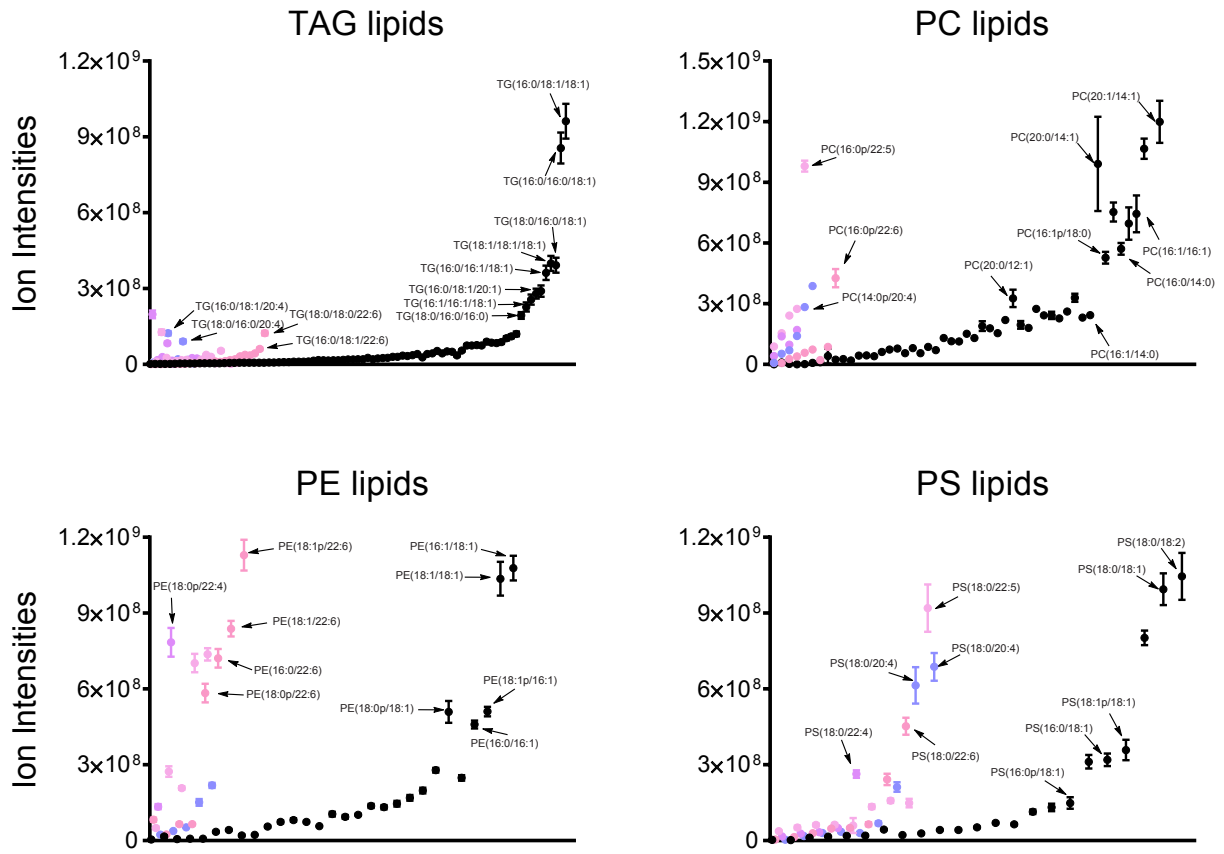

**Figure S3. Related to Figure 1. PUFA-TAGs are low abundance species compared with saturated counterparts in BMDMs.** Untargeted lipidomics profiling of DAGL $\beta$  WT BMDM lipid extracts was used to compare lipid species total ion intensities as a function of fatty acyl composition in each respective class. PUFA-TAGs were generally found at lower abundances compared with saturated TAG lipids. In contrast, the differences in abundance of PUFA and saturated phospholipid species appeared to be more evenly distributed ( $n=5$  biological samples). All data shown are representative of two independent experiments ( $n=2$  biologically independent experiments).

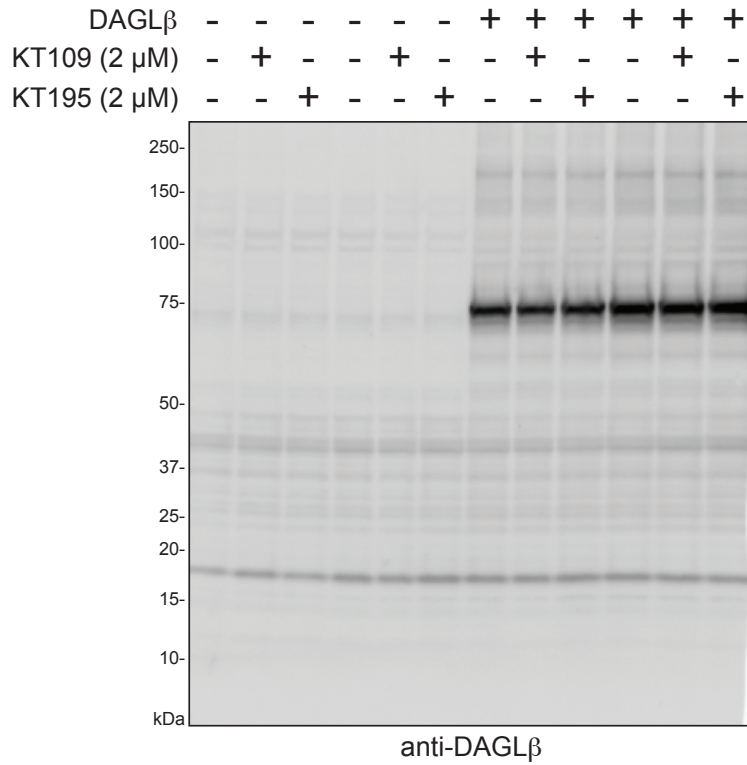

**Figure S4. Related to Figure 4. Western blot analysis of recombinant DAGL $\beta$  expression in HEK293T proteomes.** Western blot showed reproducible transient overexpression of recombinant mouse DAGL $\beta$  in HEK293T cells (anti-DAGL $\beta$  antibody). Treatment of recombinant DAGL $\beta$ -HEK293T membrane proteomes with compounds (2  $\mu$ M of KT109 or KT195, 30 min, 37 °C) did not affect expression levels of recombinant DAGL $\beta$  protein compared with vehicle controls.
